# Supplementary material for: Acidity of ortho-substituted benzoic acids: an infrared and theoretical study of the intramolecular hydrogen bonds
Source: Royal Society of Chemistry journal article supplement (doi:10.1039/b601875k), 2006-01-01
Supplement: b601875k.pdf [file b601875k.pdf]

**Acidity of *ortho*-substituted benzoic acids: an infrared and theoretical study of the intramolecular hydrogen bonds**

Stanislav Böhm,<sup>a</sup> Pavel Fiedler,<sup>b</sup> Jiří Kulhánek<sup>c</sup> and Otto Exner<sup>\*,b</sup>

<sup>a</sup> Institute of Organic Chemistry, Prague Institute of Chemical Technology, CZ-16628 Praha 6, Czech Republic

<sup>b</sup> Institute of Organic Chemistry and Biochemistry, Academy of Sciences of the Czech Republic, CZ-16610 Praha 6, Czech Republic

<sup>c</sup> Department of Organic Chemistry, Faculty of Chemical Technology, University of Pardubice, CZ-53210 Pardubice, Czech Republic

**Supplementary information**

**Table S1** Experimental vibrational frequencies of 2-hydroxybenzoic a **1** (cm<sup>-1</sup>)

| Solvent                              | CCl <sub>4</sub>   | CCl <sub>4</sub>   | CCl <sub>4</sub>   | KBr        |
|--------------------------------------|--------------------|--------------------|--------------------|------------|
| <i>c</i> mol l <sup>-1</sup>         | 1.10 <sup>-5</sup> | 1.10 <sup>-4</sup> | 1.10 <sup>-3</sup> |            |
| <b><i>C(2)-OH</i></b>                |                    |                    |                    |            |
| $\nu(\text{O-H})$                    | 3215               | 3213               | ~3213              | 3237       |
| $\beta(\text{COH}) + \text{Bz}_{14}$ | ~1364              | 1364               | 1381, 1364, 1215   | 1384, 1211 |
| $\gamma(\text{COH})$                 |                    |                    | ~684sh             | ~650sh     |
| <b><i>COOH monomer</i></b>           |                    |                    |                    |            |
| $\nu(\text{O-H})$                    | 3531               | 3531               | 3531               | 3508sh     |
| $\nu(\text{C=O})$                    | 1696               | 1696               | 1696               | ~1681sh    |
| $\gamma(\text{C=O})$                 | 644                | 643                | 643                | ~640sh     |
| $\beta(\text{COH})$                  | 1414               | 1415               | 1416               | 1406       |
| $\nu(\text{C-O}) + \text{Bz}_{13}$   | 1185               | 1185               | 1184               | 1191       |
| <b><i>COOH dimer</i></b>             |                    |                    |                    |            |
| $\nu(\text{O-H})$                    | –                  | 3200-2400          | 3200-2400          | 3300-2200  |
| $\nu(\text{C=O})$ out-of-phase       | –                  | 1662               | 1662               | 1659       |
| $\gamma(\text{C=O})$                 | –                  | 661                | 659                | 660        |

|                                       |      |            |            |            |
|---------------------------------------|------|------------|------------|------------|
| $\beta(\text{COH}) + \nu(\text{C-O})$ | –    | 1441, 1298 | 1441, 1299 | 1445, 1296 |
| $\gamma(\text{COH})$                  | –    |            | 893        | 893        |
| monomer : dimer                       | M>>D | 5 : 1      | 1 : 1      | M<<D       |

**Table S2** Experimental vibrational frequencies of tetrabutylammonium 2-hydroxybenzoate **2** ( $\text{cm}^{-1}$ )

| Solvent                                                                          | $\text{CCl}_4$                                      | $\text{CCl}_4$                                      | $\text{CHCl}_3$                                     | $\text{CHCl}_3$            |
|----------------------------------------------------------------------------------|-----------------------------------------------------|-----------------------------------------------------|-----------------------------------------------------|----------------------------|
| $c \text{ mol l}^{-1}$                                                           | $3.10^{-4}$                                         | $3.10^{-3}$                                         | $3.10^{-3}$                                         | $\sim 5.10^{-1}$           |
| $\nu(\text{O-H})$                                                                | $\sim 3333, 3195$                                   | 3346, 3195                                          | $\sim 3341, 3191$                                   | 3355, 3205                 |
| $\nu_{\text{as}}(\text{CO}_2^-) + \text{Bz}_{8\text{b}} + \text{Bz}_{8\text{a}}$ | 1633                                                | 1634, 1589                                          | 1631, 1588                                          | 1631, 1588                 |
| $\nu_{\text{s}}(\text{CO}_2^-) + \delta_{\text{s}}(\text{CH}_3)$                 | $\sim 1407\text{sh}, 1382,$<br>$\sim 1360\text{sh}$ | $\sim 1410\text{sh}, 1382,$<br>$\sim 1360\text{sh}$ | $\sim 1409\text{sh}, 1383,$<br>$\sim 1360\text{sh}$ | $\sim 1409\text{sh}, 1384$ |
| $\beta_{\text{s}}(\text{CO}_2^-) + \beta_{\text{as}}(\text{CH}_2)$               |                                                     | 882                                                 | 886sh, 880                                          | 881                        |

**Table S3** Experimental vibrational frequencies of 2-aminobenzoic acid **3** ( $\text{cm}^{-1}$ )

| Solvent                                                                         | $\text{CCl}_4$             | $\text{CCl}_4$ | $\text{CCl}_4$ | $\text{CCl}_4$ | KBr                     | Deuterated        |
|---------------------------------------------------------------------------------|----------------------------|----------------|----------------|----------------|-------------------------|-------------------|
| $c \text{ mol l}^{-1}$                                                          | $1.10^{-5}$                | $1.10^{-4}$    | $1.10^{-2}$    | saturated      |                         | Nujol             |
|                                                                                 | <b>C(2)-NH<sub>2</sub></b> |                |                |                |                         |                   |
| $\nu_{\text{as}}(\text{NH}_2)$                                                  | 3510                       | 3511           | 3512           | 3512           | 3473                    | 2532              |
| $\nu_{\text{s}}(\text{NH}_2)$                                                   | 3377                       | 3378           | 3387           | 3387           | 3374                    | 2460              |
| $\nu_{\text{as}} - \nu_{\text{s}}$                                              | 133                        | 133            | 125            | 125            | 99                      | 72                |
| $\beta_{\text{as}}(\text{NH}_2)$                                                |                            | 1092           | 1092           | 1093           | 1114                    | 880sh             |
|                                                                                 |                            | $\sim 1058$    | 1060           | 1060           | 1060                    |                   |
| $\beta_{\text{s}}(\text{NH}_2) + \text{Bz}_{8\text{b}} + \text{Bz}_{8\text{a}}$ | 1617                       | 1618, 1596     | 1617, 1590,    | 1617, 1590,    | 1618, 1588, 1615, 1588, |                   |
|                                                                                 |                            |                | 1560           | 1560           | 1564                    | 1556, $\sim 1190$ |

| <i>COOH monomer</i>                   |             |            |            |            |            |                          |
|---------------------------------------|-------------|------------|------------|------------|------------|--------------------------|
| $\nu(\text{O-H})$                     | 3544        | 3544       | 3544       | ~3545      | –          | 2603                     |
| $\nu(\text{C=O})$                     | 1709        | 1709       | 1707       | 1707       | –          | –                        |
| $\gamma(\text{C=O})$                  | 641         | 641        | 641        | 641        | –          | –                        |
| $\beta(\text{COH})$                   | 1335, 1354  | 1335, 1353 | ~1335      | ~1335      | –          | –                        |
| $\nu(\text{C-O})$                     | 1181        | 1181       | 1181       | 1181       |            |                          |
| <i>COOH dimer</i>                     |             |            |            |            |            |                          |
| $\nu(\text{O-H})$                     | 3300-2300   | 3300-2300  | 3400-2300  | 3400-2300  | 3400-2300  | 2200-2000                |
| $\nu(\text{C=O})$ out-of-phase        | –           | 1671       | 1671       | 1671       | 1674       | 1668, 1650               |
| $\gamma(\text{C=O})$                  | –           | 658        | 658        | 658        | 660        | 642                      |
| $\beta(\text{COH}) + \nu(\text{C-O})$ | ~1415, 1380 | 1418, 1300 | 1418, 1300 | 1418, 1300 | 1420, 1302 | 1034, 1044<br>1286, 1271 |
| $\gamma(\text{COH})$                  | –           | 912        | 916        | 916        | 918        | ~741                     |
| monomer : dimer                       | M>>D        | 2.5 : 1    | 1 : 9      | 1 : 13     | D          | M<<D                     |

**Table S4** Experimental vibrational frequencies of tetrabutylammonium 2-aminobenzoate **4** ( $\text{cm}^{-1}$ )

| Solvent                                                                      | $\text{CCl}_4$    | $\text{CCl}_4$    | $\text{CHCl}_3$    |
|------------------------------------------------------------------------------|-------------------|-------------------|--------------------|
| $c \text{ mol l}^{-1}$                                                       | $3 \cdot 10^{-4}$ | $3 \cdot 10^{-3}$ | $3 \cdot 10^{-3}$  |
| $\nu_{\text{as}}(\text{NH}_2)$                                               | 3464              | 3461              | 3458               |
| $\nu_{\text{s}}(\text{NH}_2)$                                                | ~3380, 3219       | 3363, 3228        | 3262               |
| $\nu_{\text{as}} - \nu_{\text{s}}$                                           | 245               | 233               | 196                |
| $\beta_{\text{s}}(\text{NH}_2)$                                              |                   | 1542sh, 1530      | 1531               |
| $\nu_{\text{as}}(\text{CO}_2^-) + \nu_{\text{Z}_{8b}} + \nu_{\text{Z}_{8a}}$ | 1614              | 1614, 1582        | 1612, 1581         |
| $\nu_{\text{s}}(\text{CO}_2^-) + \delta_{\text{s}}(\text{CH}_3)$             | 1381, 1358        | 1380, 1360        | 1410, 1382sh, 1360 |
| $\beta_{\text{s}}(\text{CO}_2^-) + \beta_{\text{as}}(\text{CH}_2)$           | ~893              | 881               | 880, 889sh         |

**Table S5** Experimental vibrational frequencies of 2-sulphonamidobenzoic acid **7** (in  $\text{cm}^{-1}$ )

| Solvent                               | $\text{CCl}_4$                             | $\text{CCl}_4$    | $\text{CCl}_4$ | KBr        |
|---------------------------------------|--------------------------------------------|-------------------|----------------|------------|
| $c$ mol $\text{l}^{-1}$               | $5 \cdot 10^{-6}$                          | $2 \cdot 10^{-5}$ | saturated      |            |
|                                       | <b><i>SO<sub>2</sub>NH<sub>2</sub></i></b> |                   |                |            |
| $\nu_{\text{as}}(\text{NH}_2)$        | 3438-6                                     | 3437              | 3436           | 3351       |
| $\nu_{\text{s}}(\text{NH}_2)$         | 3319-7                                     | 3318              | 3318           | 3253       |
| $\nu_{\text{as}} - \nu_{\text{s}}$    | ~119                                       | 119               | 118            | 98         |
| $\beta_{\text{s}}(\text{NH}_2)$       |                                            |                   |                | 1594       |
| NH <sub>2</sub> intermol. H-bond?     | ~3399-7                                    | 3398              | 3397           |            |
| $\nu_{\text{as}}(\text{SO}_2)$        |                                            | 1371, 1358        | 1371, 1355     | 1338, 1326 |
| $\nu_{\text{s}}(\text{SO}_2)$         |                                            |                   | (1179, 1162sh) | 1161       |
| $\nu(\text{S-N})$                     |                                            |                   |                | 909        |
| $\beta_{\text{s}}(\text{SO}_2)$       |                                            |                   |                | 595, 588sh |
| $\gamma_{\text{s}}(\text{SO}_2)$      |                                            |                   |                | 544        |
|                                       | <b><i>COOH monomer</i></b>                 |                   |                |            |
| $\nu(\text{O-H})$                     | ~3538                                      | 3529              | 3520           |            |
| $\nu(\text{C=O})$                     |                                            | ~1755, 1743       | 1756, 1742     |            |
|                                       | <b><i>COOH dimer</i></b>                   |                   |                |            |
| $\nu(\text{O-H})$                     |                                            |                   |                | 3300-2400  |
| $\nu(\text{C=O})$                     |                                            | 1709              | ~1712          | 1711       |
| $\gamma(\text{C=O})$                  |                                            |                   |                | 651        |
| $\beta(\text{COH}) + \nu(\text{C-O})$ |                                            |                   |                | 1395, 1250 |
| $\gamma(\text{COH})$                  |                                            |                   |                | 863        |
| monomer : dimer                       | M                                          | M>>D              | M>>D           | D          |

**Table S6** Experimental vibrational frequencies of tetrabutylammonium 2-sulphonamidobenzoate **8** (cm<sup>-1</sup>)

| Solvent                                                                          | CCl <sub>4</sub>   | CCl <sub>4</sub>   | CHCl <sub>3</sub>        |
|----------------------------------------------------------------------------------|--------------------|--------------------|--------------------------|
| <i>c</i> mol l <sup>-1</sup>                                                     | 1.10 <sup>-4</sup> | 1.10 <sup>-3</sup> | 3.10 <sup>-3</sup>       |
| $\nu(\text{NH}_2)$                                                               | 3384, ~3183        | 3389, 3308, 3173   | 3378, ~3200              |
| $\nu_{\text{as}} - \nu_{\text{s}}$                                               | 201                | 216                | 178                      |
| $\beta_{\text{s}}(\text{NH}_2)$                                                  |                    | 1524               | 1531, 1525               |
| $\nu_{\text{as}}(\text{CO}_2^-) + \text{Bz}_{8\text{b}} + \text{Bz}_{8\text{a}}$ |                    | 1607, ~1589sh      | 1607, ~1589sh<br>~1565sh |
| $\nu_{\text{s}}(\text{CO}_2^-) + \delta_{\text{s}}(\text{CH}_3)$                 | 1381, 1357         | 1380, 1360         | 1381sh, 1362             |
| $\beta_{\text{s}}(\text{CO}_2^-) + \beta_{\text{as}}(\text{CH}_2)$               |                    | 890, 882           |                          |
| $\nu_{\text{as}}(\text{SO}_2)$                                                   | 1343               | 1329               | 1338                     |
| $\nu_{\text{s}}(\text{SO}_2)$                                                    | 1165               | 1158               | 1163                     |
| $\beta_{\text{s}}(\text{SO}_2)$                                                  | 586                | 586                | 586                      |
| $\gamma_{\text{s}}(\text{SO}_2)$                                                 |                    | 541                | 541                      |
| $\nu(\text{S-N})$                                                                |                    |                    | 831                      |

**Table S7** Some calculated geometric parameters and vibrational frequencies of *ortho* substituted benzoic acids

| Structure and conformation | Bond lengths |       | Bond angles |         | $\nu(\text{O-H})$<br>cm <sup>-1</sup> | $\nu(\text{N-H})$<br>cm <sup>-1</sup> |      |
|----------------------------|--------------|-------|-------------|---------|---------------------------------------|---------------------------------------|------|
|                            | C1-C(O)      | C1-C2 | C-C1-C2     | C1-C2-X |                                       |                                       |      |
| 2-OH                       | <b>1a</b>    | 1.464 | 1.417       | 118.9   | 123.0                                 | 3768                                  | 3474 |
|                            | <b>1b</b>    | 1.476 | 1.415       | 124.8   | 124.8                                 | 3768                                  | 3691 |
|                            | <b>1c</b>    | 1.505 | 1.405       | 125.6   | 118.4                                 | 3672                                  | 3839 |
|                            | <b>1d</b>    | 1.490 | 1.411       | 126.0   | 120.3                                 | 3758                                  | 3883 |
|                            | <b>1e</b>    | 1.485 | 1.412       | 121.5   | 119.8                                 | 3778                                  | 3819 |
| 2-OH Ph-anion <sup>a</sup> | <b>2a</b>    | 1.491 | 1.443       | 120.3   | 122.0                                 | 2460                                  |      |

|                                         |           |       |       |       |       |      |      |      |
|-----------------------------------------|-----------|-------|-------|-------|-------|------|------|------|
|                                         | <b>2c</b> | 1.457 | 1.469 | 124.5 | 125.9 | 2340 |      |      |
|                                         | <b>2d</b> | 1.452 | 1.471 | 120.7 | 125.6 | 3755 |      |      |
| 2-OH Ca-anion <sup>a</sup>              | <b>2b</b> | 1.529 | 1.418 | 120.3 | 120.6 | 3789 |      |      |
|                                         | <b>2e</b> | 1.547 | 1.403 | 123.0 | 118.2 | 3839 |      |      |
| 2-NH <sub>2</sub>                       | <b>3a</b> | 1.466 | 1.425 | 120.2 | 122.4 | 3776 | 3707 | 3549 |
|                                         | <b>3b</b> | 1.476 | 1.423 | 125.6 | 124.0 | 3767 | 3717 | 3597 |
|                                         | <b>3c</b> | 1.511 | 1.409 | 124.7 | 119.8 | 3428 | 3587 | 3497 |
| 2-NH <sub>2</sub> anion                 | <b>4a</b> | 1.550 | 1.421 | 123.3 | 120.6 |      | 3220 | 3613 |
| 2-COOH                                  | <b>5a</b> | 1.491 | 1.407 | 120.6 | 124.0 | 3767 | 3757 |      |
|                                         |           | 1.501 |       |       |       |      |      |      |
|                                         | <b>5b</b> | 1.496 | 1.407 | 124.5 | 124.5 | 3761 | 3760 |      |
|                                         | <b>5c</b> | 1.535 | 1.422 | 130-0 | 124.8 | 3363 | 3759 |      |
|                                         |           | 1.488 |       |       |       |      |      |      |
|                                         | <b>5d</b> | 1.494 | 1.406 | 120.8 | 121.4 | 3762 | 3757 |      |
|                                         |           | 1.498 |       |       |       |      |      |      |
| 2-COOH anion                            | <b>6a</b> | 1.549 | 1.422 | 128.9 | 128.9 | 1727 |      |      |
|                                         | <b>6b</b> | 1.503 | 1.400 | 120.5 | 121.8 | 3775 |      |      |
|                                         |           | 1.546 |       |       |       |      |      |      |
| 2-SO <sub>2</sub> NH <sub>2</sub>       | <b>7a</b> | 1.494 | 1.408 | 123.3 | 123.6 | 3756 | 3610 | 3476 |
|                                         | <b>7b</b> | 1.498 | 1.407 | 126.2 | 123.5 | 3752 | 3624 | 3510 |
|                                         | <b>7c</b> | 1.517 | 1.410 | 127.8 | 124.0 | 3440 | 3633 | 3514 |
| 2-SO <sub>2</sub> NH <sub>2</sub> anion | <b>8a</b> | 1.557 | 1.408 | 128.1 | 124.0 |      | 3544 | 2901 |

<sup>a</sup> Phenolate and carboxylate anion, respectively.

**Table S8** Calculated energies of substituted benzoic acids and of some reference compounds, partly in fixed conformation

| Compound  | Geometry constraints | <i>E</i> (DFT) a. u. |
|-----------|----------------------|----------------------|
| <b>1f</b> | $\phi_1$ 90°         | -496.1831182         |
| <b>2f</b> | $\phi_1$ 90°         | -495.6335427         |
| <b>3g</b> | $\phi_1$ 90°         | -476.3137138         |

|                                        |                                     |               |
|----------------------------------------|-------------------------------------|---------------|
| <b>4c</b>                              | $\phi_1 90^\circ$                   | -475.7677017  |
| <b>5f</b>                              | $\phi_1 90^\circ$                   | -609.5698253  |
| <b>6c</b>                              | $\phi_1 90^\circ$                   | -609.0274486  |
| <b>7d</b>                              | $\phi_1 90^\circ$                   | -1024.9505363 |
| <b>8b</b>                              | $\phi_1 90^\circ$                   | -1024.4259653 |
| 4-hydroxybenzoic acid                  | $\phi_1 90^\circ$                   | -496.1848894  |
| 4-hydroxybenzoate anion                | $\phi_1 90^\circ$                   | -495.6329012  |
| 4-aminobenzoic acid                    | $\phi_1 90^\circ$                   | -476.3146925  |
| 4-aminobenzoate anion                  | $\phi_1 90^\circ$                   | -475.7616263  |
| 1,4-benzenedicarboxylic acid           | $\phi_1 90^\circ$                   | -609.5732549  |
| 1,4-benzenedicarboxylic acid           | $\phi_1 28^\circ, \phi_2 220^\circ$ | -609.5778044  |
| 1,4-benzenedicarboxylic acid monoanion | $\phi_1 90^\circ$                   | -609.0296084  |
| 4-sulphonamidobenzoic acid             | no constraints                      | -1024.9618549 |
| 4-sulphonamidobenzoic acid             | $\phi_1 36^\circ, \phi_2 48^\circ$  | -1024.9569097 |
| 4-sulphonamidobenzoic acid             | $\phi_1 90^\circ$                   | -1024.9518985 |
| 4-sulphonamidobenzoate anion           | no constraints                      | -1024.4281035 |
| 4-sulphonamidobenzoate anion           | $\phi_1 39^\circ, \phi_2 57^\circ$  | -1024.4199694 |
| 4-sulphonamidobenzoate anion           | $\phi_1 90^\circ$                   | -1024.4227250 |
| benzenesulphonamide                    |                                     | -836.3273776  |

---
